# Supplementary material for: Removal of Medicaid Prior Authorization Requirements and Buprenorphine Treatment for Opioid Use Disorder
Source: PubMed Central journal article supplement (PMC10589810; doi:10.1001/jamahealthforum.2023.3549), 2023-10-20
Supplement: jamahealthforum-e233549-s002.pdf [file jamahealthforum-e233549-s002.pdf]

## Data Sharing Statement

Christine. Removal of Medicaid Prior Authorization Requirements and Buprenorphine Treatment for Opioid Use Disorder. *JAMA Health Forum*. Published October 20, 2023. doi:10.1001/jamahealthforum.2023.3549

### Data

**Data available:** Yes

**Data types:** Participant data with identifiers

**How to access data:** [paul.christine@cuanschutz.edu](mailto:paul.christine@cuanschutz.edu)

**When available:** With publication

### Supporting Documents

**Document types:** Other (please specify)

**Additional Information:** Prior authorization policy data and sources, NDC codes for buprenorphine prescriptions

**How to access documents:** This will be provided in the online supplement to the publication for others to freely use and adapt

**When available:** With publication

### Additional Information

**Who can access the data:** anyone requesting the data

**Types of analyses:** for any purpose

**Mechanisms of data availability:** via emailing the corresponding author
